# Supplementary material
Source: PubMed Central journal article supplement (PMC3712979)

**A** *Wrm<sup>Δhel/Δhel</sup>* vs Wild type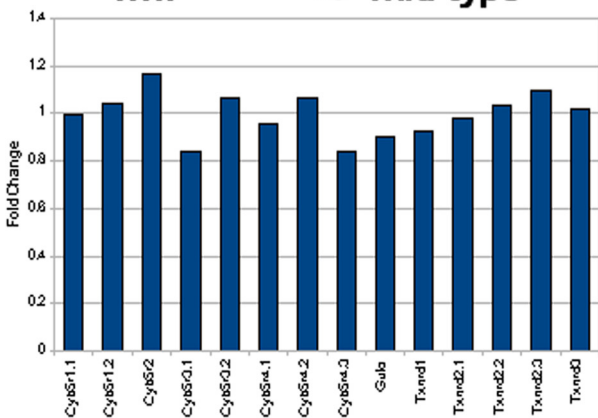**B** Thioredoxin reductase activity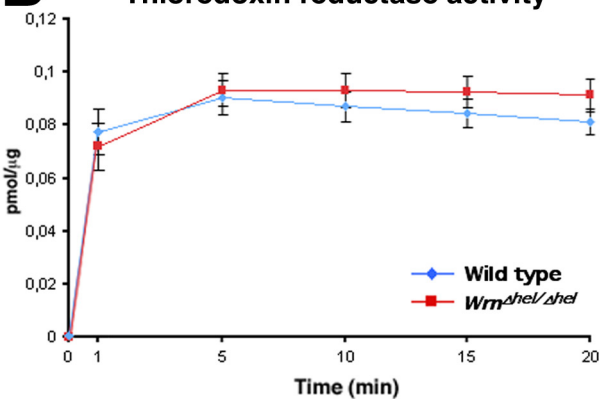**C** Cytochrome b5 reductase activity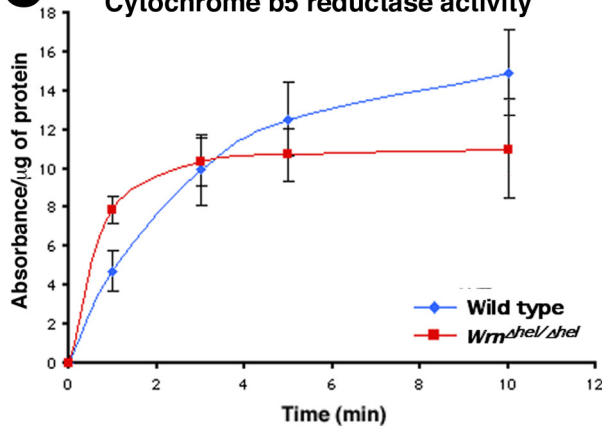

Supplement: NIHMS3020-supplement-FigS2.pdf [file NIHMS3020-supplement-FigS2.pdf]
