# Supplementary material
Source: PubMed Central journal article supplement (PMC3712979)

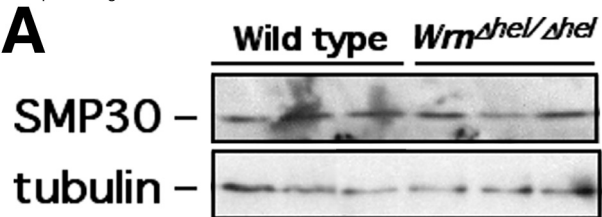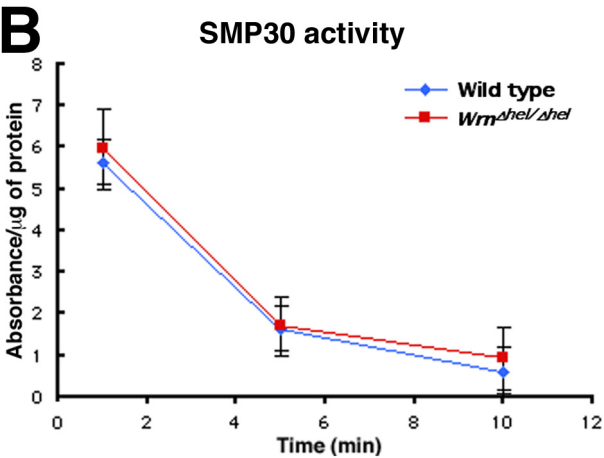

Supplement: NIHMS3020-supplement-FigS1.pdf [file NIHMS3020-supplement-FigS1.pdf]

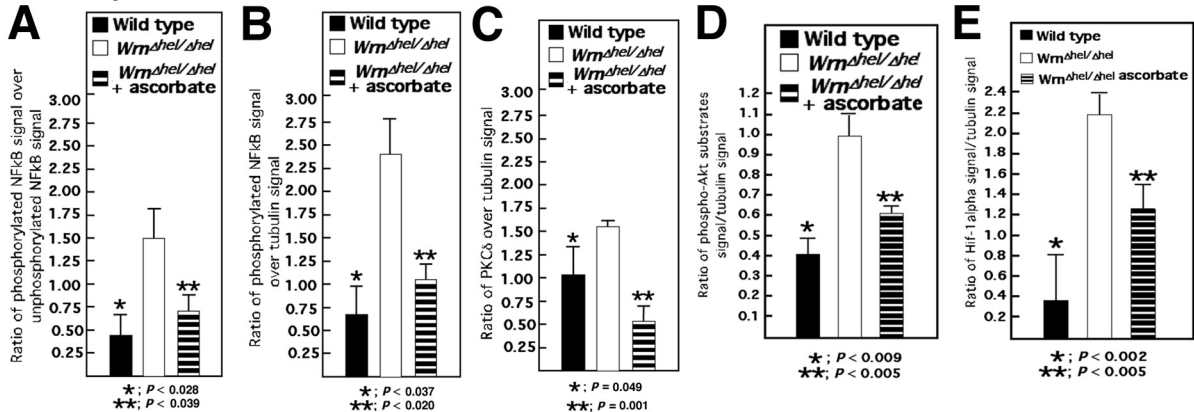

Supplement: NIHMS3020-supplement-FigS3.pdf [file NIHMS3020-supplement-FigS3.pdf]

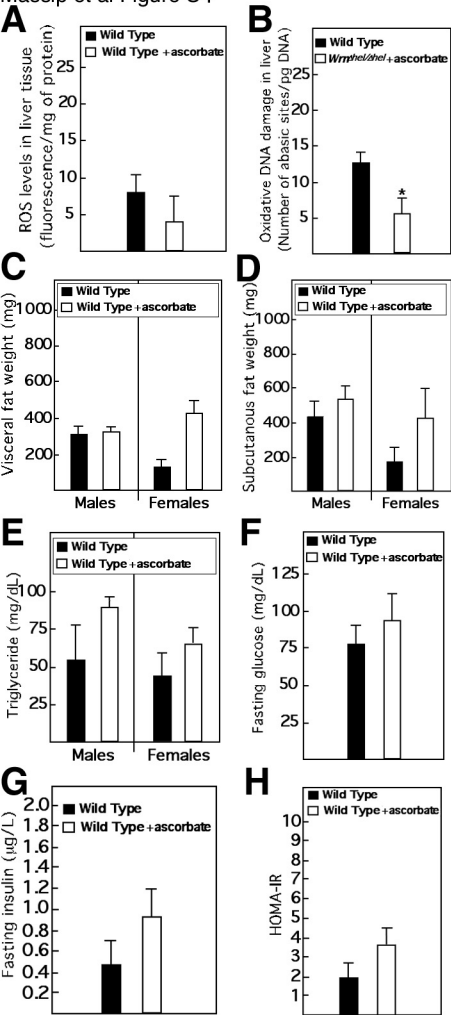

Supplement: NIHMS3020-supplement-FigS4.pdf [file NIHMS3020-supplement-FigS4.pdf]
